# Supplementary material
Source: Springer Nature journal article supplement (https://www.springermedizin.de/resource/supplementary/12960_2008_180_MOESM5_ESM.pdf/9570584)

## Salaries(R\$)

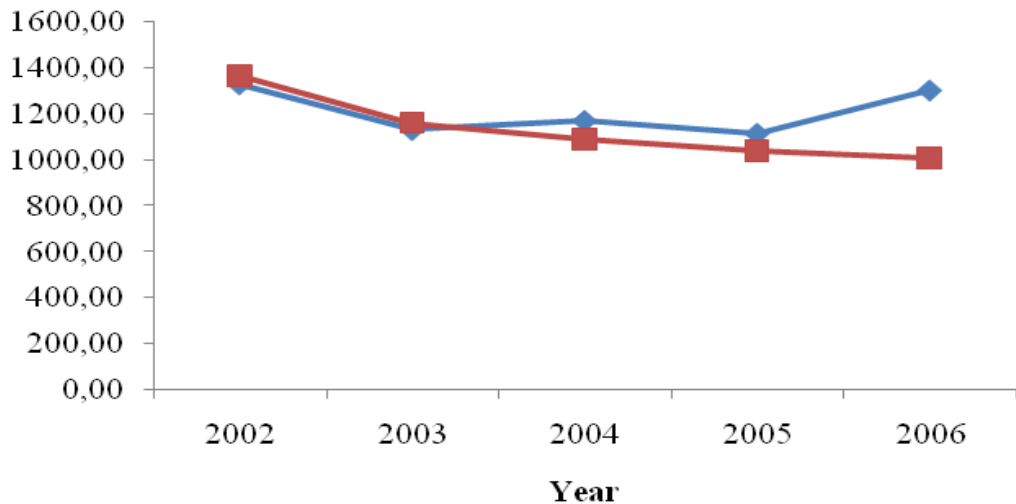

—◆— Permanent Doctor

—■— Non Permanent Doctor

Supplement: MOESM5 [file 9570584]
